# Supplementary material
Source: PubMed Central journal article supplement (PMC2857504)
Supplement: NIHMS29524-supplement-1.pdf [file NIHMS29524-supplement-1.pdf]

(A)

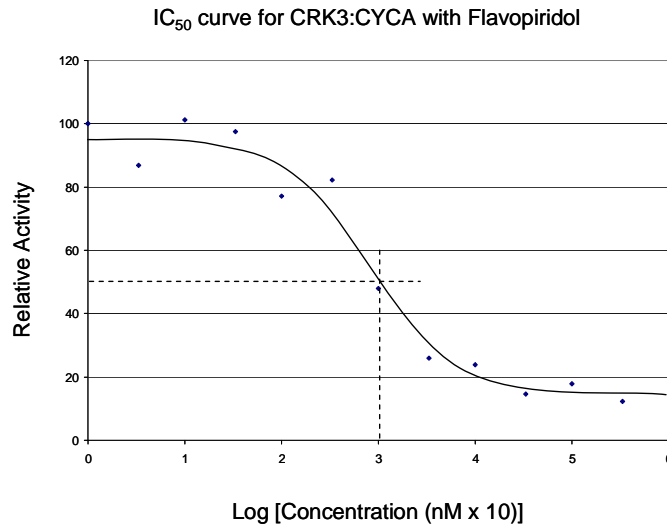

(B)

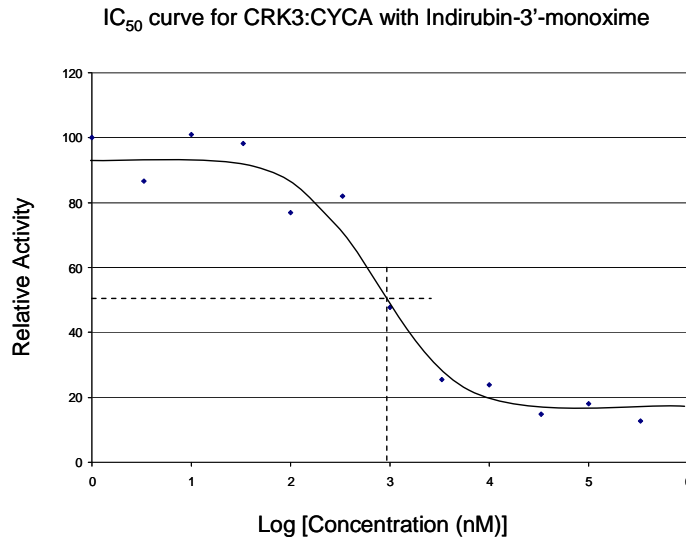

**Figure S1. Inhibition of CRK3:CYCA by Flavopiridol and Indirubin 3'-monoxime: Determination of the IC<sub>50</sub>** The histone H1 kinase activity of CRK3:CYCA complex (4  $\mu$ g) was assessed in the presence of increasing concentrations of (A) Flavopiridol or (B) Indirubin 3'-monoxime. Phosphorylated histone H1 was detected following SDS-PAGE and quantified by phosphor-imaging (Typhoon). After correction for background, the amount of phosphorylated histone H1 in each reaction was normalised against the uninhibited control to give the relative activity (% of uninhibited controls). These were plotted against the log (concentration in nM) for indirubin 3' monoxime (B) and against the log (concentration in nM x 10) for flavopiridol (A) (the concentration in nM was multiplied by 10 to avoid negative log values). The concentration required to reduce histone H1 kinase activity by 50% (IC<sub>50</sub>) was determined from the resultant graph.
